# Supplementary material for: Oxidative stress‐induced dysregulation of excitation–contraction coupling contributes to muscle weakness
Source: PubMed Central journal article supplement — J Cachexia Sarcopenia Muscle. 2018 Aug 2;9(5):1003–17. doi: 10.1002/jcsm.12339 (PMC6204588; doi:10.1002/jcsm.12339), 2018-08-02
Supplement: JCSM-9-1003-s001.pdf [file JCSM-9-1003-s001.pdf]

## **Oxidative stress induced dysregulation of excitation-contraction coupling contributes to muscle weakness**

Rizwan Qaisar<sup>1</sup>, Shylesh Bhaskaran<sup>1</sup>, Pavithra Premkumar<sup>1</sup>, Rojina Ranjit<sup>1</sup>, Kavithalakshmi Satara Natarajan<sup>1</sup>, Bumsoo Ahn<sup>1</sup>, Kaitlyn Riddle<sup>1</sup>, Dennis R Clafin<sup>2,3</sup>, Arlan Richardson<sup>5,3,6</sup> Susan V. Brooks<sup>4</sup>, Holly Van Remmen<sup>1,5</sup>

<sup>1</sup> Aging and Metabolism Research Program, Oklahoma Medical Research Foundation, Oklahoma City, OK 73104, USA.

<sup>2</sup> Department of Surgery, Section of Plastic Surgery, University of Michigan, Ann Arbor, Michigan 48109, USA

<sup>3</sup> Department of Biomedical Engineering, University of Michigan, Ann Arbor, Michigan 48109, USA

<sup>4</sup> Department of Molecular and Integrative Physiology, University of Michigan, Ann Arbor, Michigan

<sup>5</sup> Oklahoma City VA Medical Center, Oklahoma City, OK 73104, USA.

<sup>6</sup> Department of Geriatric Medicine and the Reynolds Oklahoma Center of Aging, Oklahoma University Health Science Center, Oklahoma City, OK, USA

### **Corresponding author:**

Holly Van Remmen, Ph. D.  
Aging and Metabolism Research Program  
Oklahoma Medical Research Foundation  
825 NE 13<sup>th</sup> Street  
Oklahoma City, OK 73104  
Phone: 405-271-2520  
Fax: 271-3470  
Email: Holly-VanRemmen@omrf.org

**Supplementary Fig 1. Muscle fatigue**

Time course of contractile force decline in EDL muscles during 400 seconds of fatiguing stimulations. Values are expressed as Mean  $\pm$  SEM (n = 8-12 per group). ; One-way ANOVA. \*  $P \leq 0.05$ , \*\*  $P \leq 0.01$ , \*\*\*  $P \leq 0.001$ , \*\*\*\*  $P \leq 0.0001$  ANOVA.

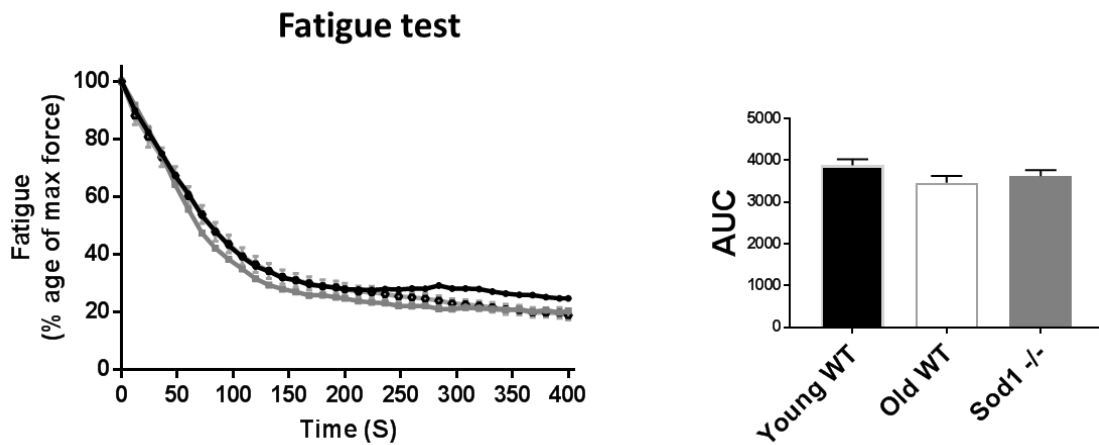

**Supplementary Fig 2. Expressions of genes associated with muscle quantity and quality**

mRNA expression of genes associated with muscle functional and structural phenotypes in the gastrocnemius muscles of young and old WT and Sod 1<sup>-/-</sup> mice. Values are expressed as Mean ± SEM (n = 8-12 per group). One-way ANOVA. \* P ≤ 0.05,

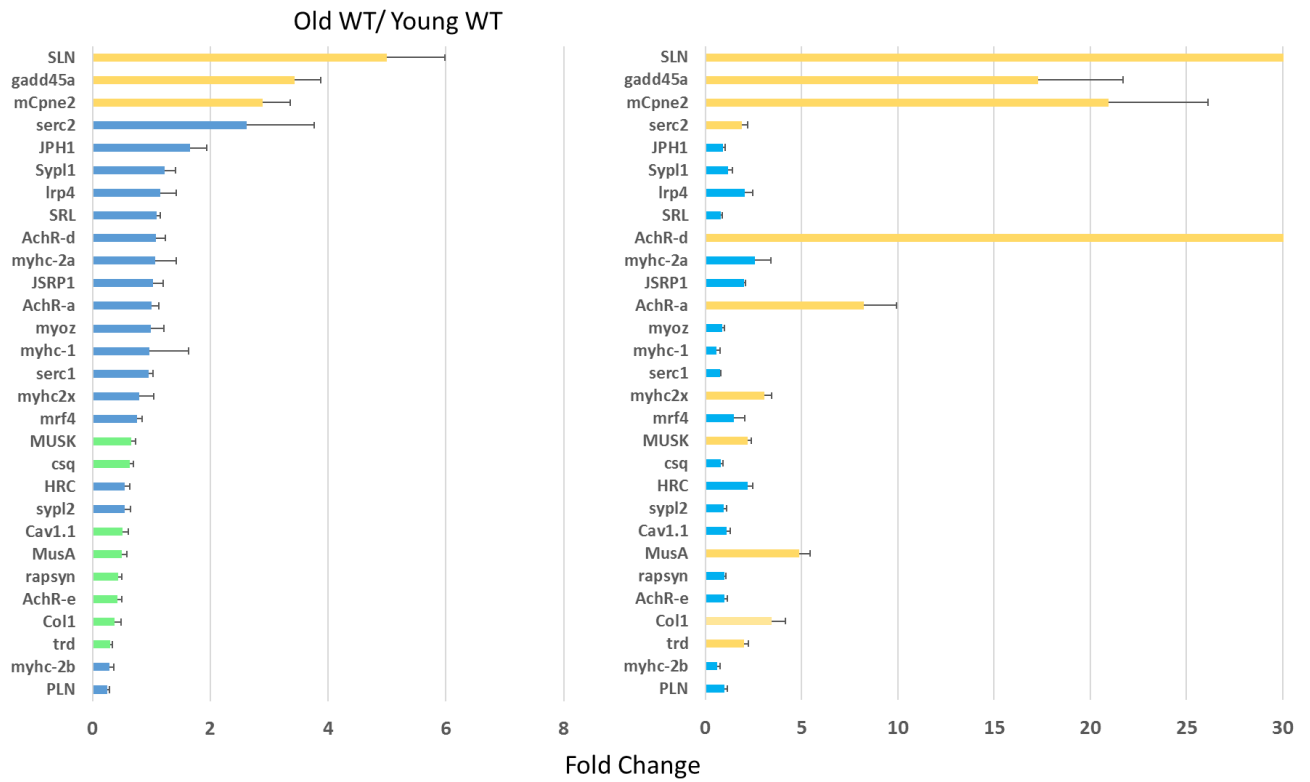

**Supplementary Table 1. Muscle weights**

Absolute muscle weights and the muscle weights normalized to body weights from the young and old WT and *Sod 1<sup>-/-</sup>* mice. Values are expressed as Mean  $\pm$  SEM (n = 8-12 per group). \*  $P < 0.05$  vs. Young WT, €  $P < 0.05$  vs. Old WT; 1-way ANOVA.

|                                                 | Young WT         | Old WT            | <i>Sod 1<sup>-/-</sup></i> |
|-------------------------------------------------|------------------|-------------------|----------------------------|
| <b><u>Muscle weights (g)</u></b>                |                  |                   |                            |
| Quadriceps                                      | 0.44 $\pm$ 0.01  | 0.35 $\pm$ 0.01*  | 0.32 $\pm$ 0.14*           |
| Tibialis Anterior                               | 0.15 $\pm$ 0.01  | 0.10 $\pm$ 0.01*  | 0.10 $\pm$ 0.01*           |
| EDL                                             | 0.03 $\pm$ 0.003 | 0.02 $\pm$ 0.002* | 0.02 $\pm$ 0.003*          |
| <b><u>Muscle Weights / Body Weights (%)</u></b> |                  |                   |                            |
| Quadriceps                                      | 1.20 $\pm$ 0.048 | 0.92 $\pm$ 0.031* | 1.14 $\pm$ 0.034€          |
| Tibialis Anterior                               | 0.40 $\pm$ 0.02  | 0.29 $\pm$ 0.03*  | 0.35 $\pm$ 0.015           |
| EDL                                             | 0.08 $\pm$ 0.007 | 0.05 $\pm$ 0.004* | 0.08 $\pm$ 0.008€          |

**Supplementary Table 2. Primers sequences for RT-PCR**

| <b>Gene</b>    |        | <b>Primer Sequence</b>                             |
|----------------|--------|----------------------------------------------------|
| SLN            | F<br>R | GAGGTGGAGAGACTGAGGTCCTTGG<br>GAAGCTCGGGGCACACAGCAG |
| GADD45a        | F<br>R | AGACCGAAAGGATGGACACG<br>GTACACGCCGACCGTAATG        |
| mCpne2         | F<br>R | CATCCCCTTGGGTTCTCAGTG<br>GTTGACGGCTGTTTCTGTTCT     |
| SERCA2         | F<br>R | GAGAACGCTCACACAAAGACC<br>CAATTCGTTGGAGCCCCAT       |
| JPH1           | F<br>R | CAGCGGCAACACCTACCAG<br>GTAGCGCCCCTTGAACCAT         |
| Sypl1          | F<br>R | AAAGGCCTGTCCGATGTGAAG<br>TCCCTCAGTTCCTTGCATGTG     |
| LRP4           | F<br>R | TCTGCGCACACGGAATAGC<br>GCGCTCACCGCACATGT           |
| SRL            | F<br>R | GCAGAAGTGCAAGAGGGGAAGT<br>TCTAGCTCTGTGGATTGGTGA    |
| AChR-d         | F<br>R | CATCGAGTGGATCATCATTGAC<br>CGGCGGATGATAAGGTAGAA     |
| MyHC-2a        | F<br>R | ATGAGCTCCGACGCCGAG<br>TCTGTTAGCATGAACTGGTAGGCG     |
| JSPR1          | F<br>R | AGAACGTGGAGGGTCCATCTC<br>TCCCCTTTACTTGGCTTCTCTTT   |
| AChR- $\alpha$ | F<br>R | ACCTGGACCTATGACGGCTCT<br>AGTTACTCAGGTCGGGCTGGT     |
| MyoZ           | F<br>R | TGAACCAGTCCCTTCGCTG<br>ATGGCCTGCAAACCTTTCTGAT      |
| MyHC-1         | F<br>R | CCTTGGCACCAATGTCCCGGCTC<br>GAAGCGCAATGCAGAGTCGGTG  |
| SERCA1         | F<br>R | TGTTTGTCTATTTTCGGGGTG<br>AATCCGCACAAGCAGGTCTTC     |
| MyHC-2x        | F<br>R | AAGGAGCAGGACACCAGCGCCCA<br>ATCTCTTTGGTCACTTTCTGCT  |
| MRF4           | F<br>R | TGCTAAGGAAGGAGGAGCAA<br>CCTGCTGGGTGAAGAATGTT       |
| MUSK           | F<br>R | TCCTGCGTGCTCCTGAATC<br>TGCAGCGTAGGGTTACAAAGG       |
| CSQ            | F<br>R | CTGGCACTGCTGTTTGTACTG<br>GGGGGCTCATGGTAGAGGAG      |
| HRC            | F<br>R | GGAACACGACCCTTGTGTG<br>GGACTCGTTTTCTCTCCACG        |
| Sypl2          | F<br>R | CGCACCTCGGACAAGTCTC<br>CCCGAAGGCGAAAATAGC          |
| Cav1.1         | F<br>R | GTTACATGAGCTGGATCACACAG<br>ATGAGCATTTTCGATGGTGAAG  |

|         |        |                                                     |
|---------|--------|-----------------------------------------------------|
| MusA    | F<br>R | TCGTGGAATGGTAATCTTGC<br>CCTCCCGTTTCTCTATCACG        |
| Rapsyn  | F<br>R | GGGACTGGAGGATGCTGACTT<br>TGCGCGCCAGGTTCA            |
| AChR-e  | F<br>R | GATTGGCATTGACTGGCACG<br>CCACTCCAACTGCCCATC          |
| Col1a1  | F<br>R | CAGTCGATTCACCTACAGCACG<br>GGGATGGAGGGAGTTTACACG     |
| Trd     | F<br>R | AGAAGACAGCAACTCACAAAGAG<br>GGTGGTGGCATAACTGGGC      |
| MyHC-2b | F<br>R | GTGATTTCTCCTGTCACCTCTC<br>GGAGGACCGCAAGAACGTGCTGA   |
| PLN     | F<br>R | ATGACGACGATTCAAATCTCTTGG<br>TGGGTTTGCAAAGTTAGGCATAA |

Note: SLN: Sarcolipin; GADD45a: Growth arrest and DNA-damage-inducible protein 45a; mCpne2: Copine 2; SERCA2: Sarcoplasmic reticulum calcium ATPase 2; JPH1: Junctophilin 1; Sypl1: Synaptophysin like 1; LRP4: LDL receptor related protein 4; SRL: Sarcalumenin; AChR-d: Acetylcholine receptor delta; MyHC-2a: Myosin heavy chain type 2a; JSRP1: Junctional sarcoplasmic reticulum protein 1; AChR- $\alpha$ : Acetylcholine receptor alpha; MyoZ: Myozenin; MyHC-1: Myosin heavy chain type 1; SERCA1: Sarcoplasmic reticulum calcium ATPase 1; MyHC-2x: Myosin heavy chain type 2x; MRF4: Myogenic regulatory factor 4; MUSK: Muscle associated receptor tyrosine kinase; CSQ: Calsequestrin; HRC: Histidine-rich calcium binding protein; Sypl2: Synaptophysin like 2; Cav1.1: Calcium channel, voltage dependent, L type, alpha 1S subunit; AChR-e: Acetylcholine receptor epsilon; Col1a1: Collagen type 1 alpha 1; trd: triadin; MyHC-2b: Myosin heavy chain type 2b; PLN: Phospholamban
